# Supplementary material for: A Novel Cytotoxic Steroidal Saponin from the Roots of Asparagus cochinchinensis
Source: MDPI journal article supplement (doi:10.3390/plants10102067), 2021-09-30

## A Novel Cytotoxic Steroidal Saponin from the Roots of *Asparagus cochinchinensis*

### Contents

#### General Experimental procedure

**Figure S1.** HR-ESI-MS spectrum of compound **1**

**Figure S2.** The  $^1\text{H}$ -NMR (800 MHz,  $\text{C}_5\text{D}_5\text{N}$ ) spectrum of compound **1**

**Figure S3.** The  $^{13}\text{C}$ - and DEPT135-NMR (200 MHz,  $\text{C}_5\text{D}_5\text{N}$ ) spectra of compound **1**

**Figure S4.** The HSQC spectrum of compound **1** in  $\text{C}_5\text{D}_5\text{N}$

**Figure S5.** The COSY spectrum of compound **1** in  $\text{C}_5\text{D}_5\text{N}$

**Figure S6.** The HMBC spectrum of compound **1** in  $\text{C}_5\text{D}_5\text{N}$

**Figure S7.** The NOESY spectrum of compound **1** in  $\text{C}_5\text{D}_5\text{N}$

**General Experimental procedure**

UV spectra were evaluated on Optizen pop (Mecasys, Daejeon, Korea). MPA 100 (Stanford research systems, Sunnyvale, CA, USA) was used to measure melting points in open capillary tubes. Optical rotations were obtained on a Jasco P-2000 polarimeter (JASCO, Tokyo, Japan), using a 10-cm microcell. AVNACE III HD (Bruker, German) 800 MHz was used for obtaining NMR spectra. HR-Mass spectra were obtained by a Q-TOF micro mass spectrometer (Waters, Milford, Massachusetts, USA). TLC analyses were performed on Silica gel 60 F<sub>254</sub> (Merck, Kenilworth, MA, USA) and RP-18 F<sub>254S</sub> (Merck) plates. Compounds were visualized by dipping plates into 20% (v/v) H<sub>2</sub>SO<sub>4</sub> reagent (Samchun, Seoul, Korea) and then heated at 110°C for 5-10 min. Agilent Cary 630 FTIR (Agilent Technologies, Santa Clara, CA, USA) was applied to obtain IR spectrum. Sephadex LH-20 (Amersham Pharmacia Biotech, Buckinghamshire, United Kingdom), Silica gel (Merck 60A, 230-400 mesh ASTM), Diaion HP-20 (Mitsubishi, Tokyo, Japan), and reversed-phase silica gel (YMC Co., ODS-A 12 nm S-150  $\mu$ m) were used for column chromatography. Pre-packed cartridges (Teledyne Isco, Superior St, Lincoln, USA) were used for flash chromatography. Flash chromatography was performed using the flash purification system (Combi Flash Rf, Teledyne Isco). HPLC was performed using Waters purification system (Waters, Milford, Massachusetts, USA) (1525 pump, PDA 1996 detector) with Gemini NX-C18 110A column (250  $\times$  21.2mm i.d. 5  $\mu$ m, Phenomenex, Torrance, CA, USA). Before chromatographic separations, all solvents used for this study were distilled.

Figure S1. HR-ESI-MS spectrum of compound 1

**Single Mass Analysis**

Tolerance = 5.0 mDa / DBE: min = -1.5, max = 50.0

Element prediction: Off

Number of isotope peaks used for i-FIT = 3

Monoisotopic Mass, Even Electron Ions

622 formula(e) evaluated with 4 results within limits (up to 50 closest results for each mass)

Elements Used:

| Mass      | Calc. Mass | mDa  | PPM  | DBE  | Formula     | i-FIT | i-FIT Norm | Fit Conf % | C  | H  | O  |
|-----------|------------|------|------|------|-------------|-------|------------|------------|----|----|----|
| 1209.5892 | 1209.5881  | 1.1  | 0.9  | 42.5 | C82 H81 O9  | 280.8 | 1.023      | 35.95      | 82 | 81 | 9  |
|           | 1209.5904  | -1.2 | -1.0 | 11.5 | C57 H93 O27 | 280.9 | 1.158      | 31.42      | 57 | 93 | 27 |
|           | 1209.5939  | -4.7 | -3.9 | 33.5 | C75 H85 O14 | 281.3 | 1.495      | 22.43      | 75 | 85 | 14 |
|           | 1209.5845  | 4.7  | 3.9  | 20.5 | C64 H89 O22 | 282.1 | 2.283      | 10.20      | 64 | 89 | 22 |

180628\_ASCQ\_K6\_neg

180628\_ASCQ\_K6\_neg 348 (3.897)

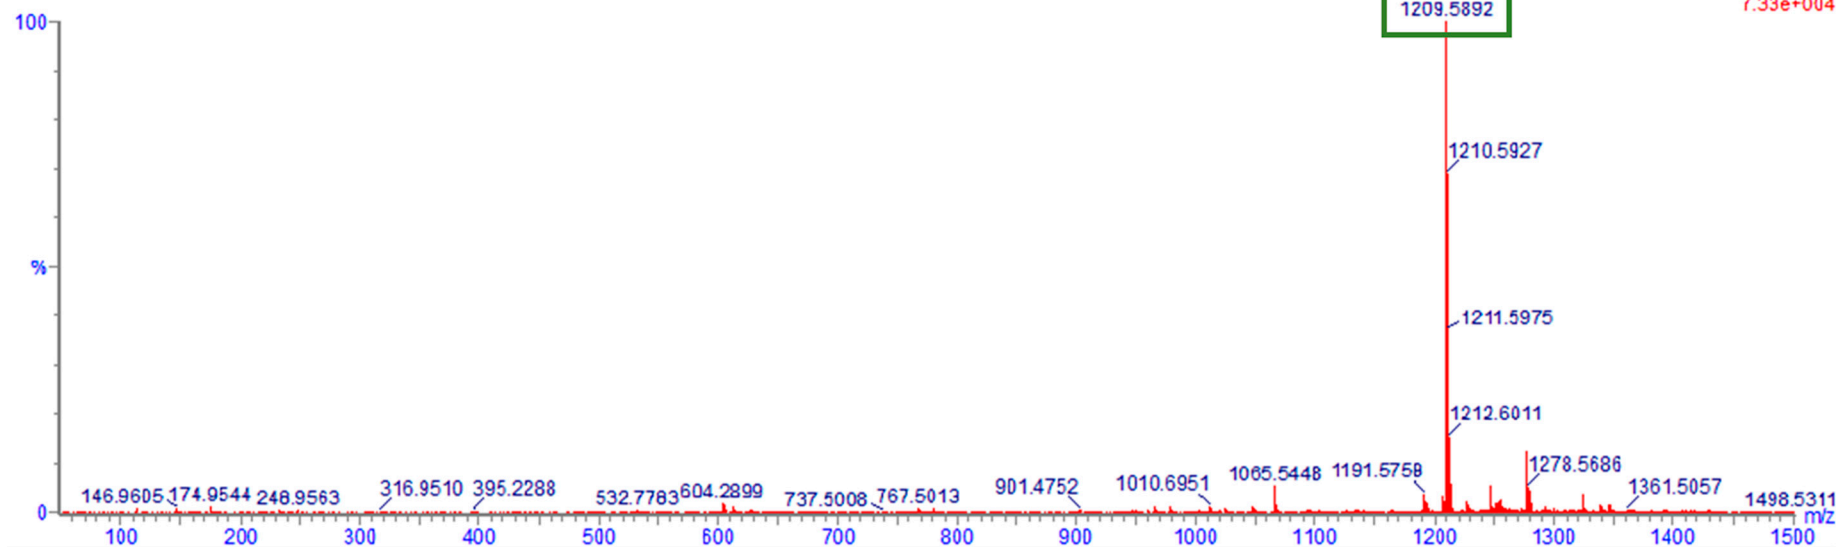

**Figure S2.** The  $^1\text{H}$ -NMR (800 MHz,  $\text{C}_5\text{D}_5\text{N}$ ) spectrum of compound **1**

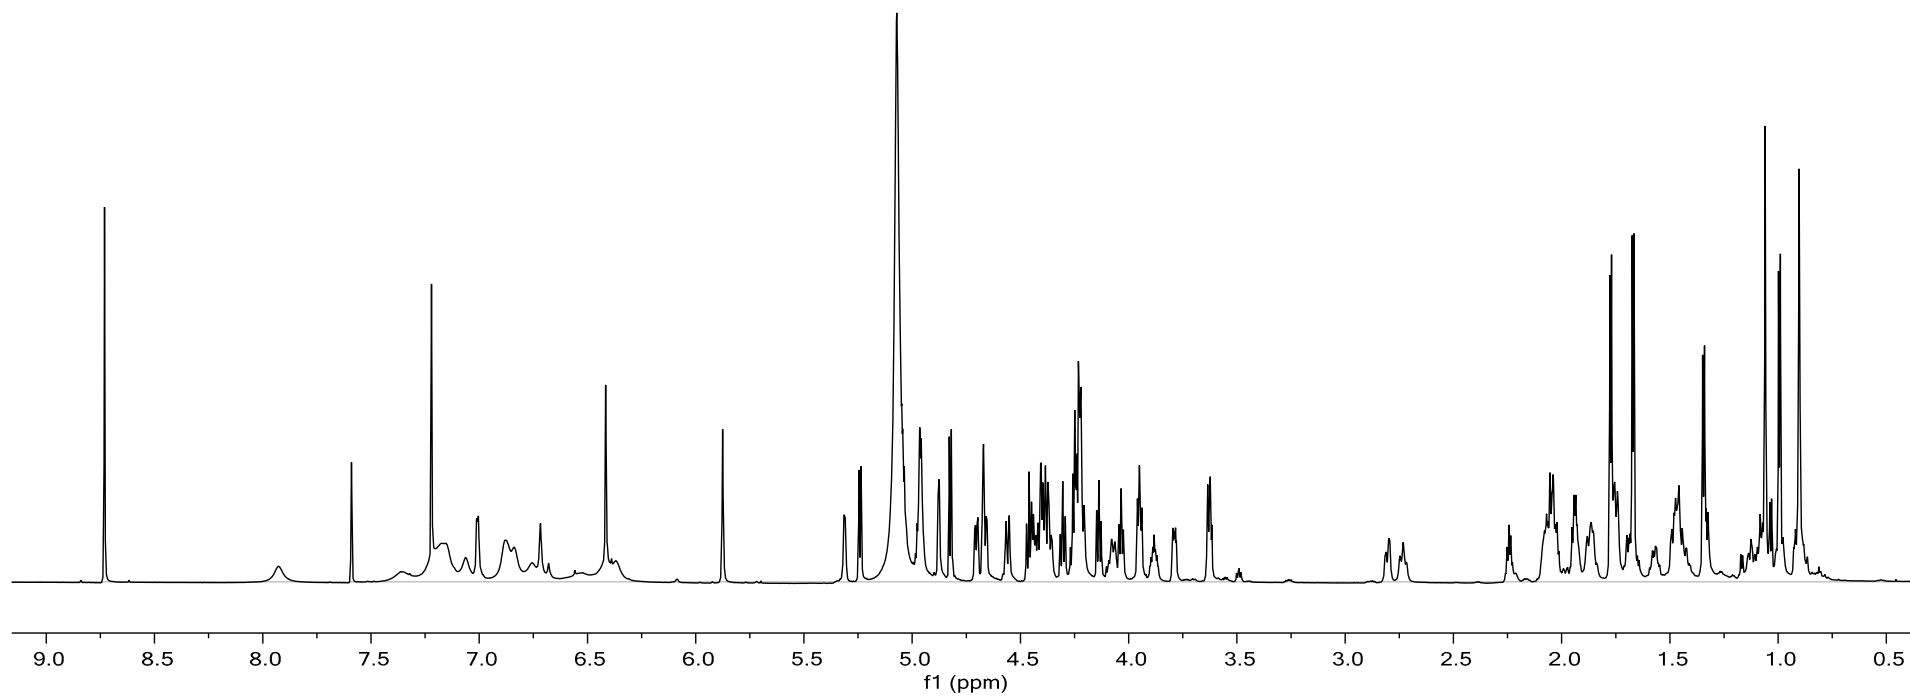

**Figure S3.** The  $^{13}\text{C}$ - and DEPT135-NMR (200 MHz,  $\text{C}_5\text{D}_5\text{N}$ ) spectra of compound **1**

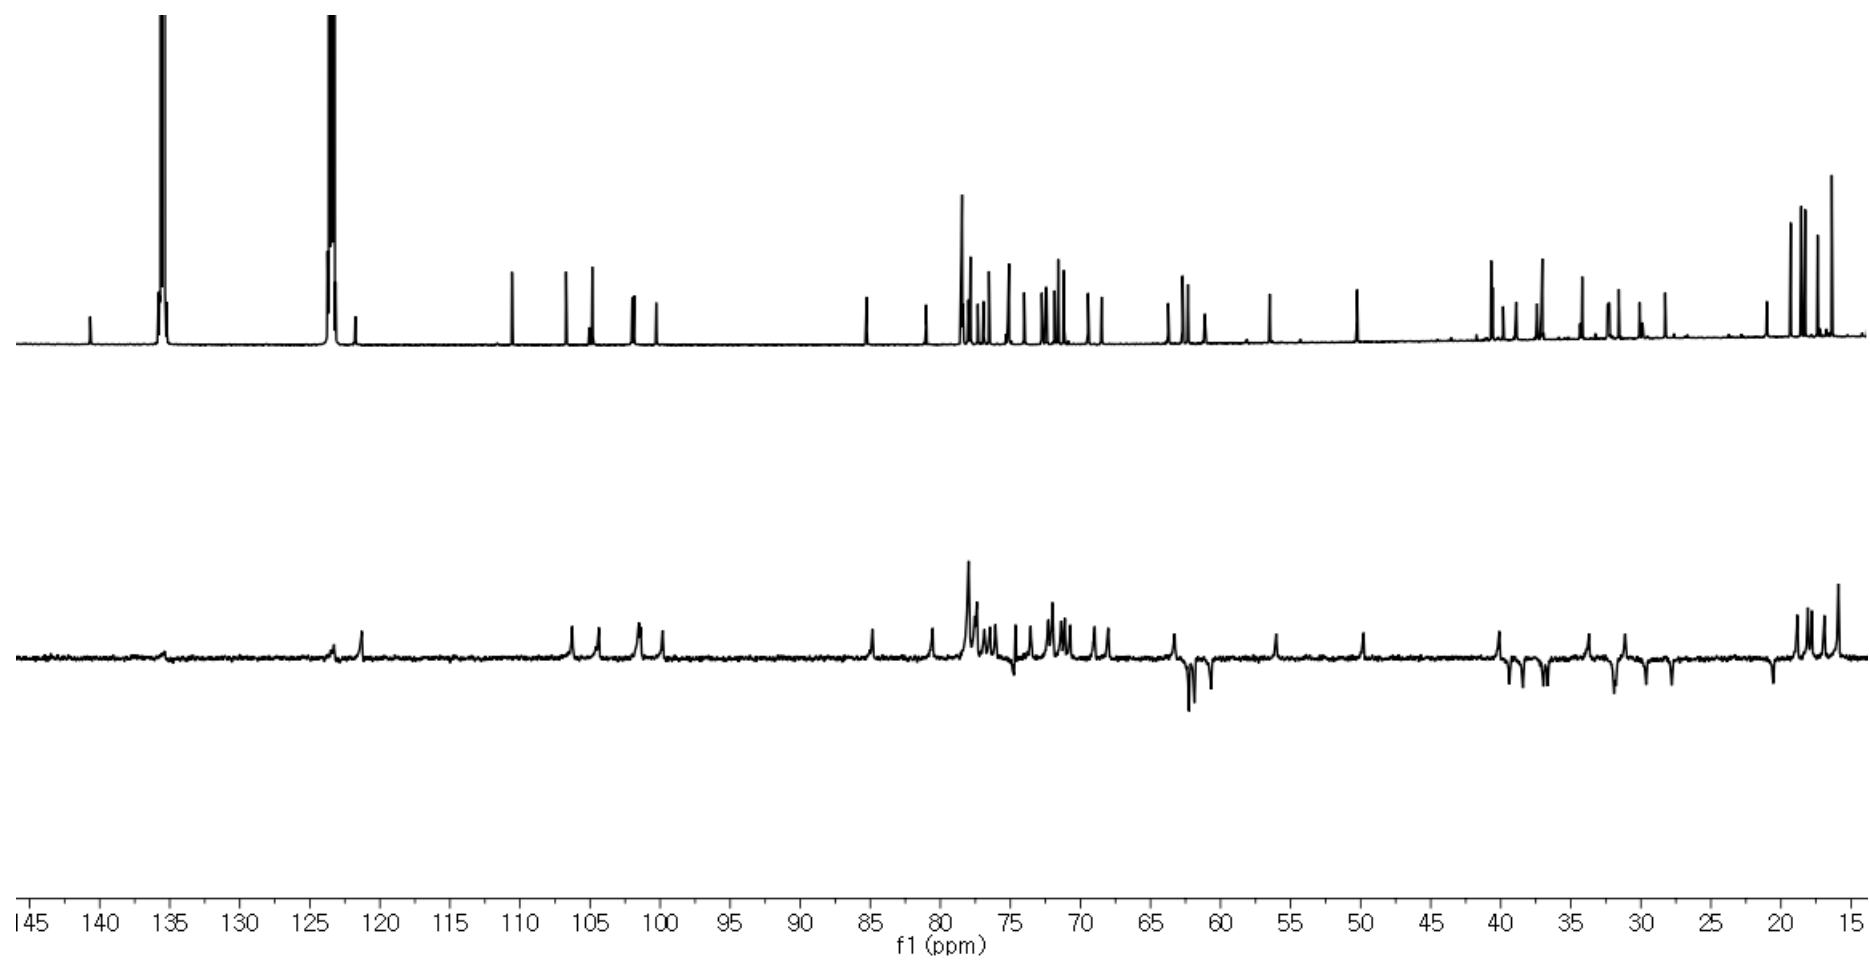

**Figure S4.** The HSQC spectrum of compound **1** in  $\text{C}_5\text{D}_5\text{N}$

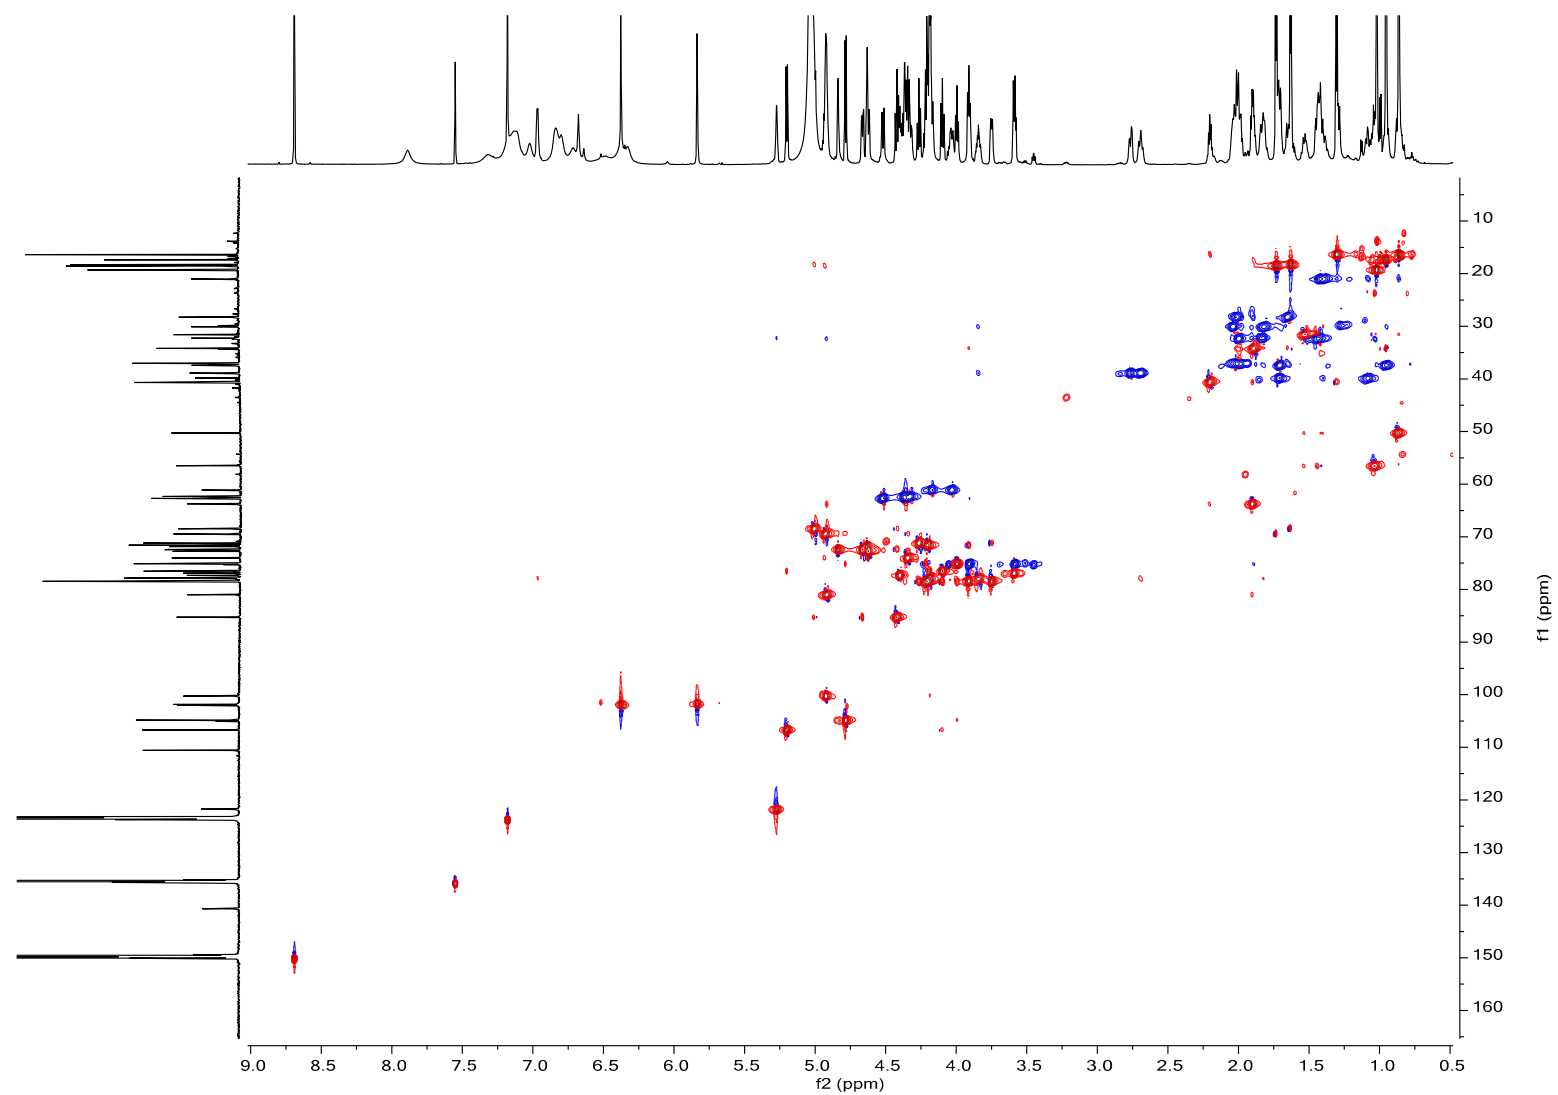

**Figure S5.** The COSY spectrum of compound **1** in  $\text{C}_5\text{D}_5\text{N}$

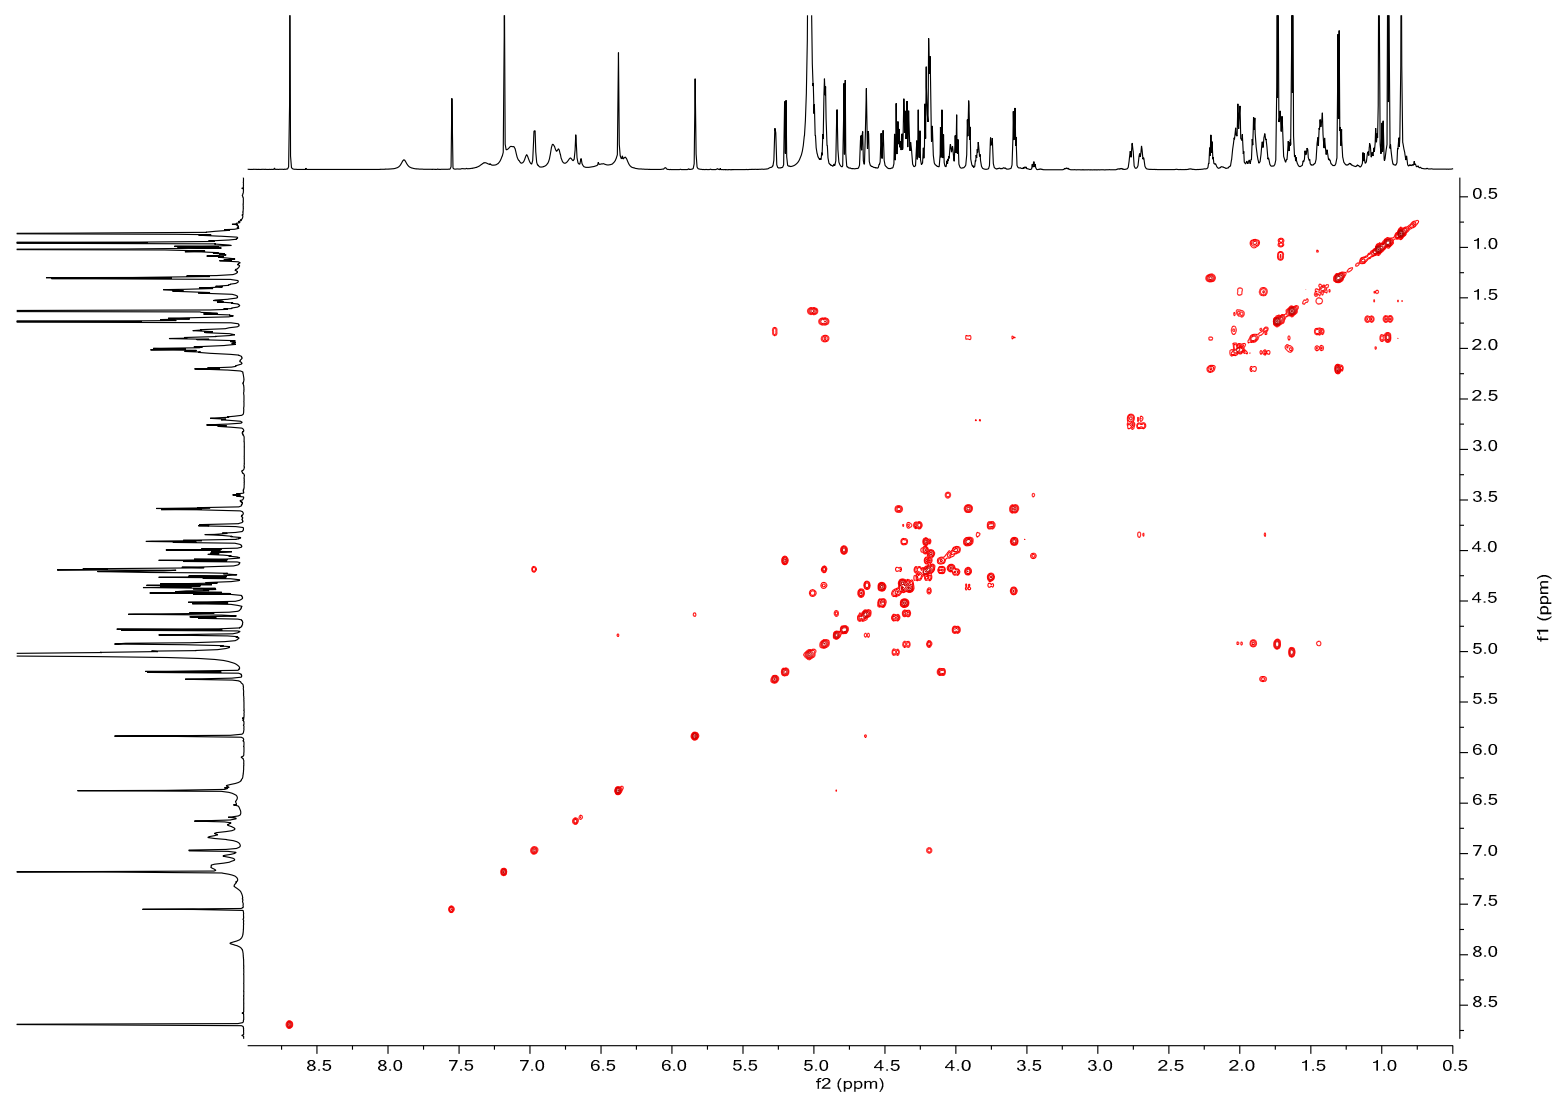

**Figure S6.** The HMBC spectrum of compound **1** in  $\text{C}_5\text{D}_5\text{N}$

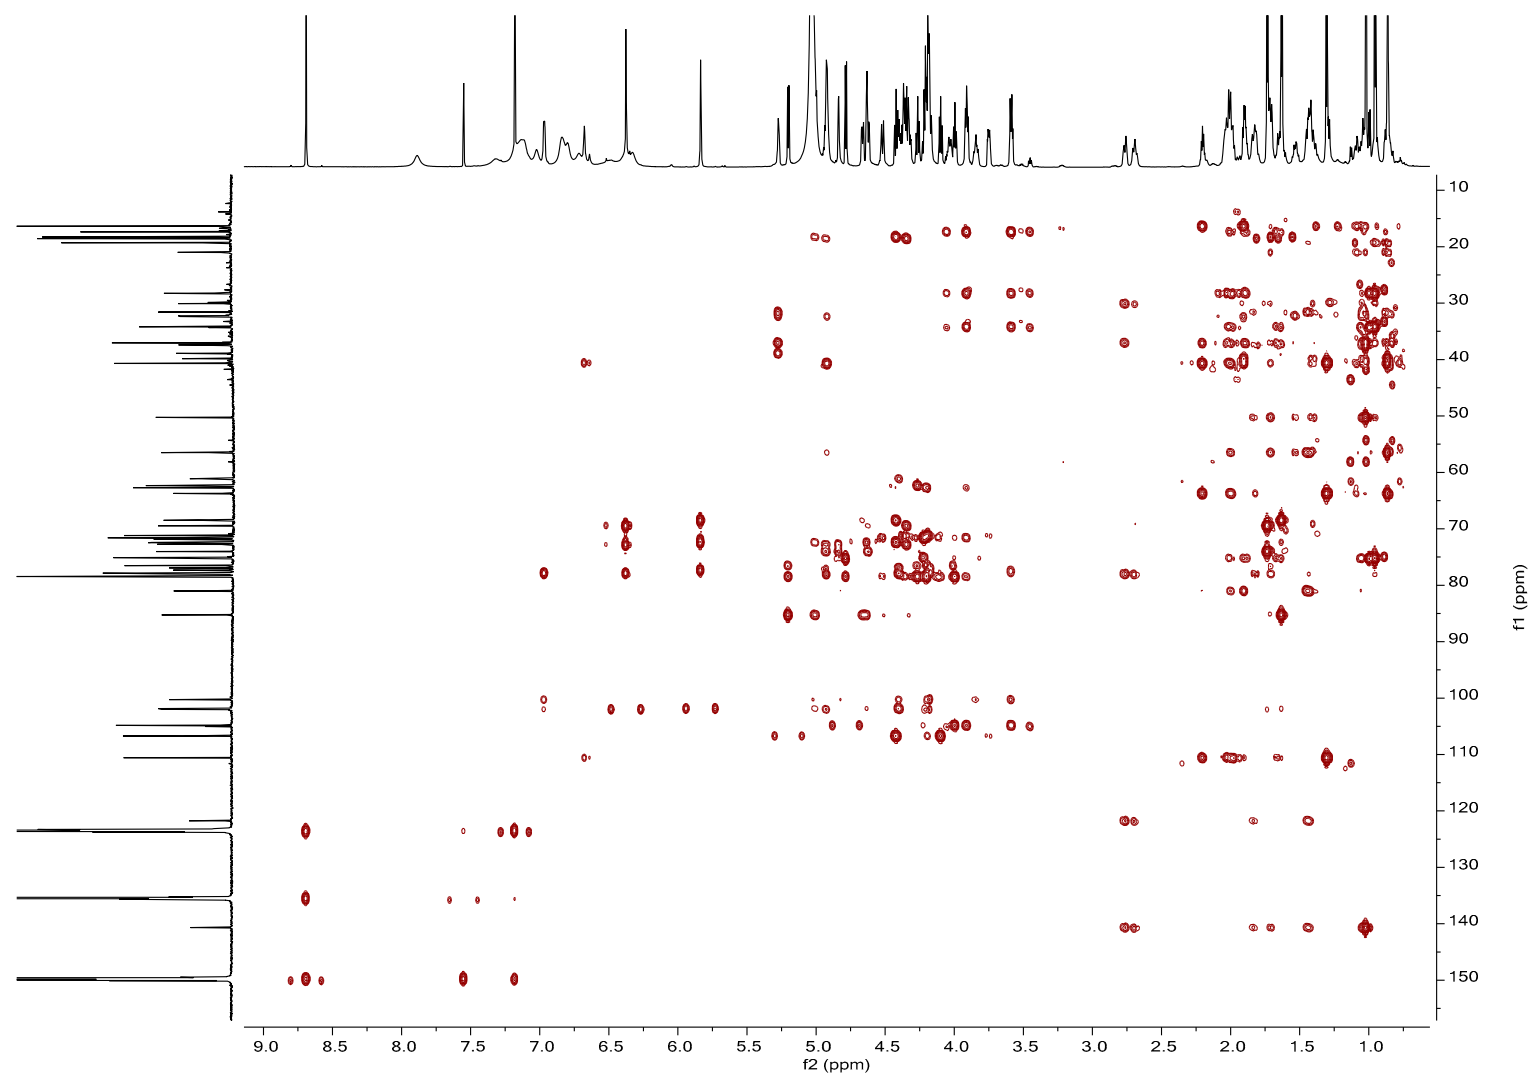



**Figure S7.** The NOESY spectrum of compound **1** in C<sub>5</sub>D<sub>5</sub>N

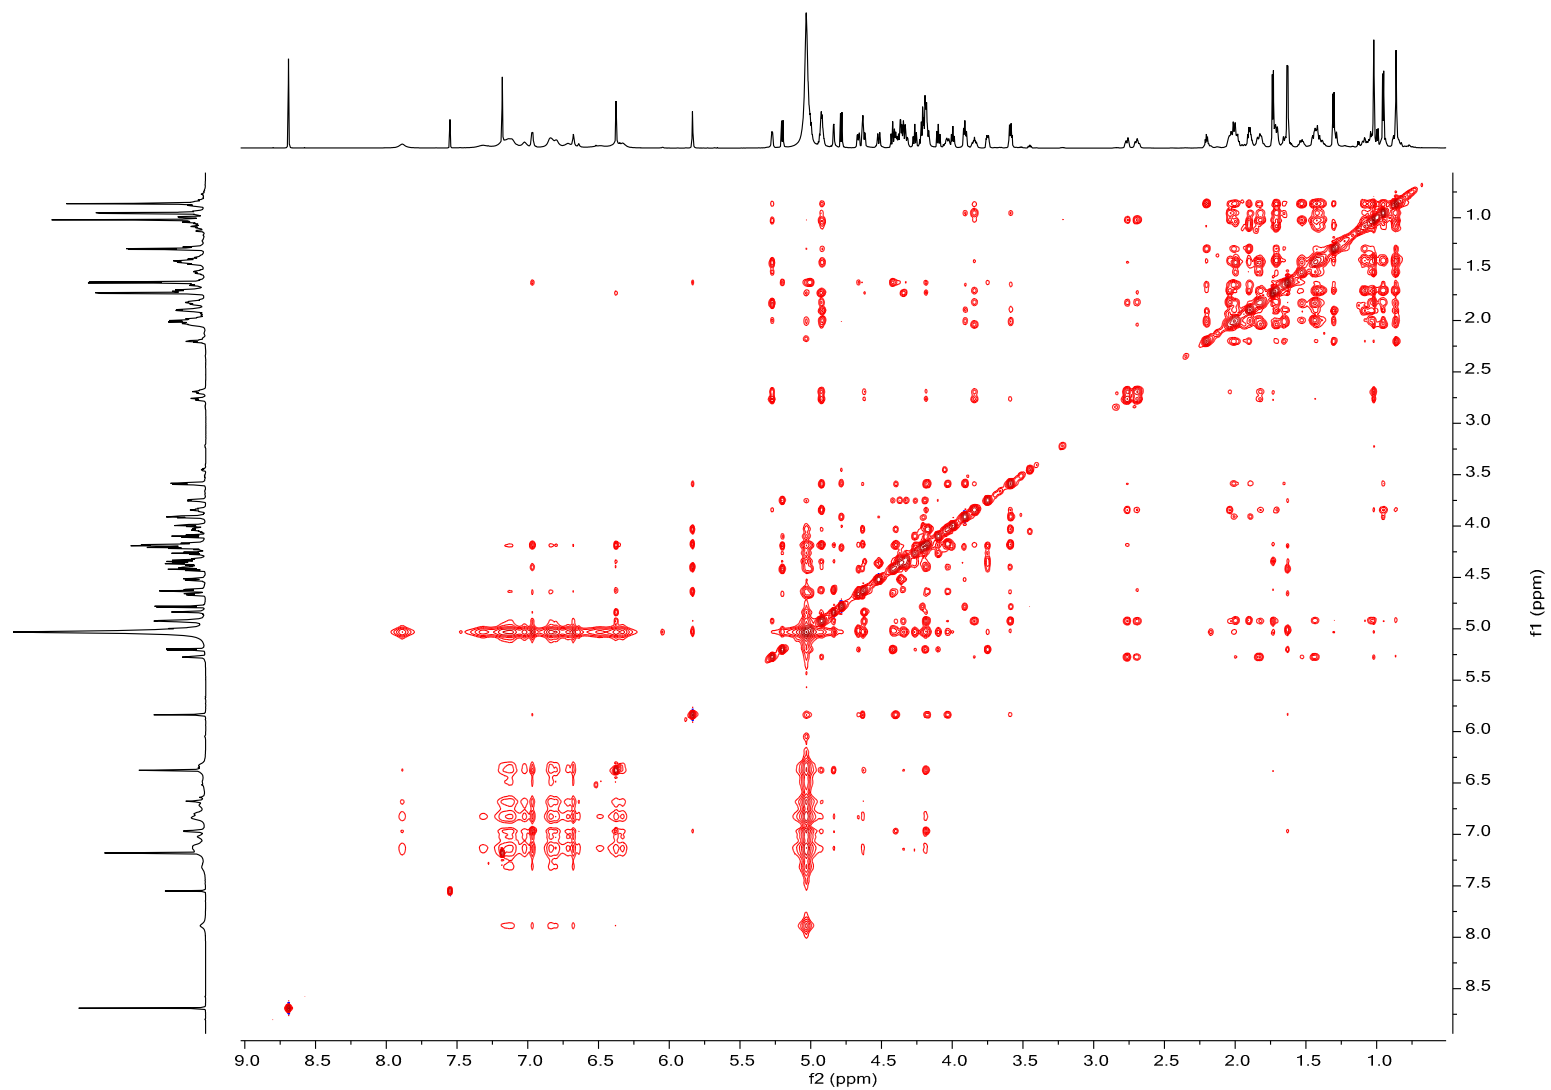

Supplement: s1 [file s1]
